# Supplementary material for: Promotor Hypomethylation Mediated Upregulation of miR-23b-3p Targets PTEN to Promote Bronchial Epithelial-Mesenchymal Transition in Chronic Asthma
Source: PubMed Central journal article supplement (PMC8765721; doi:10.3389/fimmu.2021.771216), 2022-01-04
Supplement: DataSheet_1.pdf [file DataSheet_1.pdf]

## Supplementary Figure 1

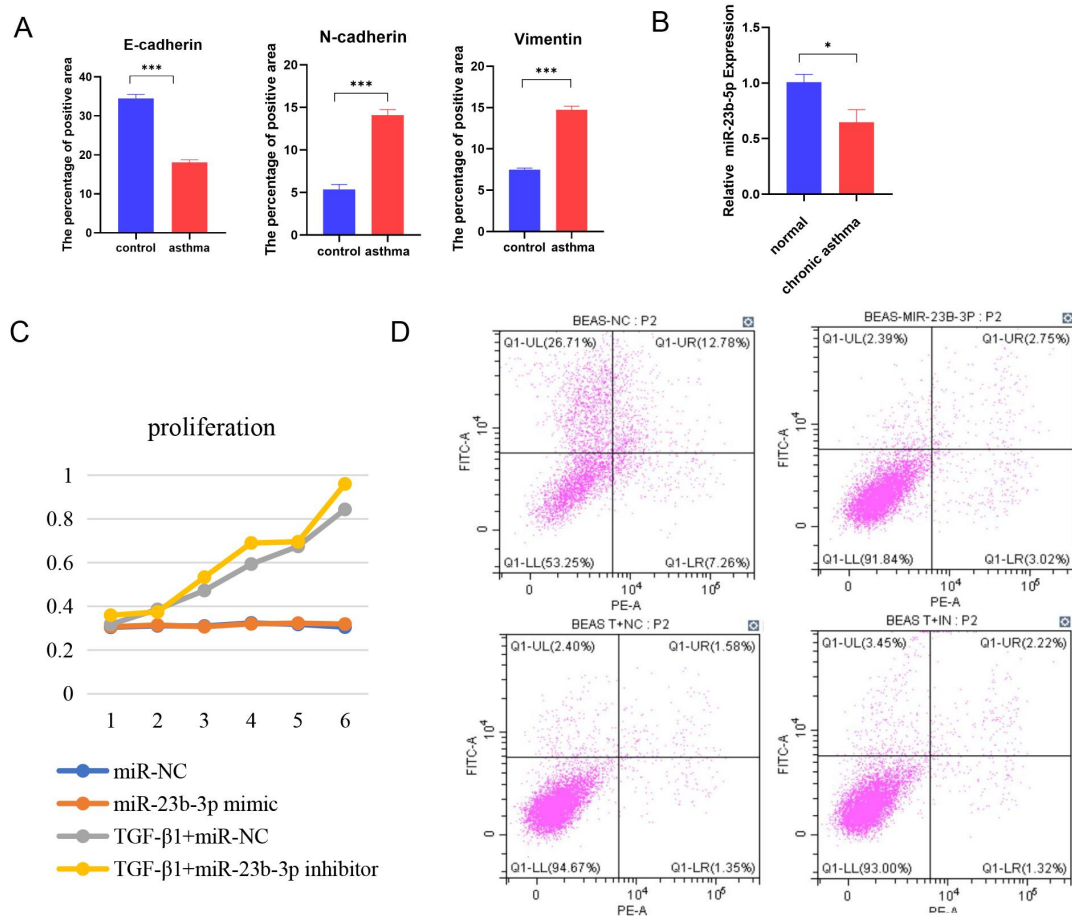

Supplementary figure 1: (A) Immunohistochemical analysis of E-cadherin, N-cadherin, and vimentin in lung tissues and quantitative statistics of each group. (B) RT-qPCR analysis of the mRNA level of miR-23b-5p from the lung of mice. (C) CCK8 test of BEAS-2B transfected with miR-23b-3p mimic or miR-23b-3p inhibitor with or without TGF-β1 treatment in 5 days. (D) Flow cytometry analysis of apoptosis of BEAS-2B transfected with miR-23b-3p mimic or miR-23b-3p inhibitor with or without TGF-β1 treatment. The results are presented as the means  $\pm$  SD of three independent experiments. \* $P < 0.05$ , \*\* $P < 0.01$ , \*\*\* $P < 0.001$  compared with the indicated groups.

Supplementary Figure 2

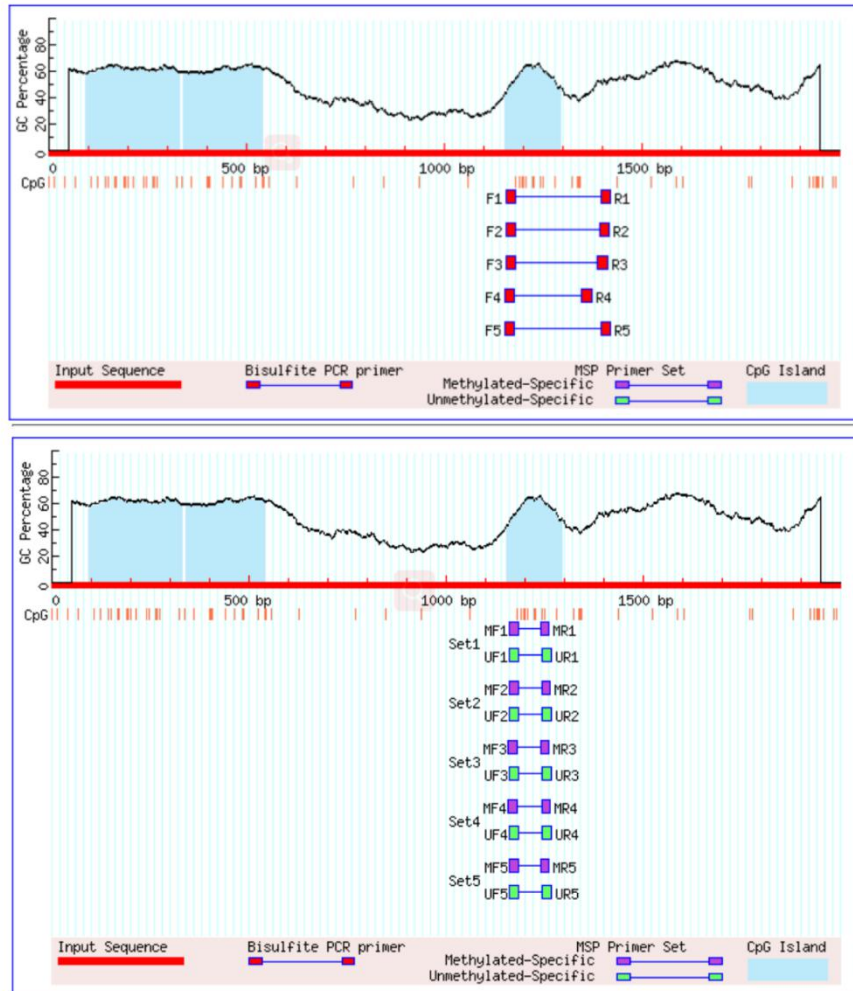

Supplementary figure 2: Genomic structure and distribution of miR-23b-3p CpG dinucleotides over the transcription start site (TSS).

Supplementary Figure 3

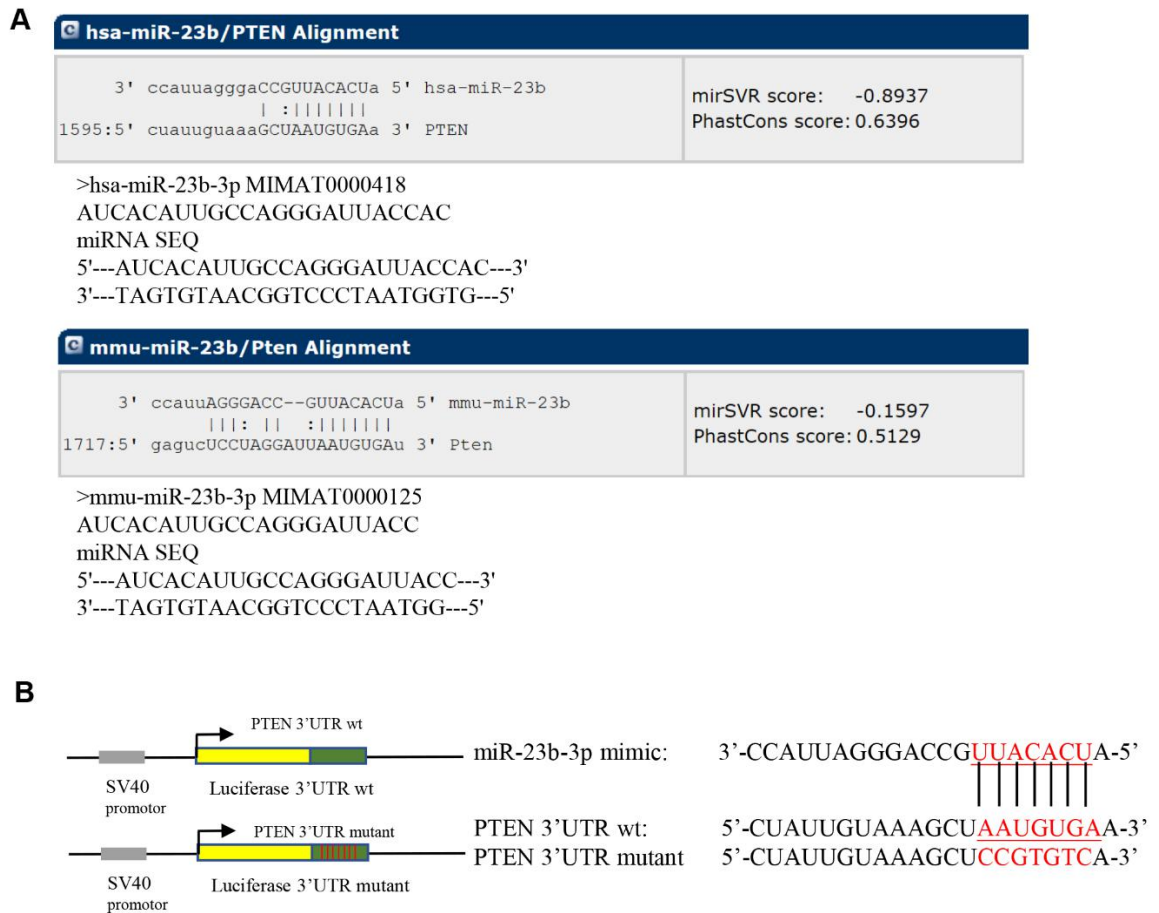

Supplementary figure 3: (A) mmu-miR-23b-3p and has-miR-23b-3p were both directly targeted PTEN with same binding site. (B) Dual-luciferase reporter assay. The relative luciferase activity was normalized to the renilla luciferase activity assay after cotransfection with the miR-23b-3p mimic and miR-RB-REPORT constructs containing WT or MUT PTEN 3'UTR region in 293T cell lines.

Supplementary Table 1: Primer sequences applied for gene expression analyses

| species | gene              | Forward primer                              | Reversed primer         |
|---------|-------------------|---------------------------------------------|-------------------------|
| human   | E-cadherin        | ATTTTCCCTCGACACCCGAT                        | TCCCAGGCGTAGACCAAGA     |
|         | N-cadherin        | TCAGGCGTCTGTAGAGGCTT                        | ATGCACATCCTTCGATAAGACTG |
|         | Vimentin          | AGTCCA CTGTACCGGAGAC                        | CATTTACGCATCTGGCGTTC    |
|         | $\beta$ -actin    | CATGTACGTTGCTATCCAGGC                       | CTCCTTAATGTCACGCACGAT   |
|         | PTEN              | TGGATTGACTTAGACTTGACCT                      | GGTGGGTTATGGTCTCAAAGG   |
|         | DNMT1             | CCTAGCCCCAGGATTACAAGG                       | ACTCATCCGATTTGGCTCTTTC  |
|         | DNMT3a            | CCGATGCTGGGGACAAGAAT                        | CCCATCATCCACCAAGACAC    |
|         | DNMT3b            | CCCAGCTCTTACCTTACCATCG                      | GGTCCCCTATTCCAAACTCCT   |
|         | miR-23b-3p RT     | CTCAACTGGTGTCTGGAGTCGGCAATTCAGTTGAGGTAGTAAT |                         |
|         | miR-23b-3p        | ACACTCCAGCTGGGATCACATTGCCAGGGAT             | TGGTGTCTGGAGTCTG        |
| U6      | CTCGCTTCGGCAGCACA | AACGCTTCACGAATTTGCGT                        |                         |
| mouse   | E-cadherin        | CAGTTCGAGGTCTACACCTT                        | TGAATCGGGAGTCTTCCGAAAA  |
|         | N-cadherin        | AGCGCAGTCTTACCGAAGG                         | TCGCTGCTTTCATACTGAACTTT |
|         | Vimentin          | CGTCCACACGCACCTACAG                         | GGGGGATGAGGAATAGAGGCT   |
|         | $\beta$ -actin    | GGCTGTATTCCCCTCCATCG                        | CCAGTTGGTAACAATGCCATGT  |
|         | PTEN              | TGGATTGACTTAGACTTGACCT                      | GCGGTGTCATAATGTCTCTCAG  |
|         | DNMT1             | CCGTGGCTACGAGGAGAAC                         | TTGGGTTTCCGTTTAGTGGGG   |
|         | DNMT3a            | GATGAGCCTGAGTATGAGGATGG                     | CAAGACACAATTCGGCCTGG    |
|         | DNMT3b            | CGTTAATGGGAACCTCAGTGACC                     | CTGCGTGTAATTCAGAAGGCT   |
|         | miR-23b-3p RT     | CTCAACTGGTGTCTGGAGTCGGCAATTCAGTTGAGGGTAATCC |                         |
|         | miR-23b-3p        | ACACTCCAGCTGGGTGGGTTCCCTGGCATGC             | TGGTGTCTGGAGTCTG        |
| U6      | CTCGCTTCGGCAGCACA | AACGCTTCACGAATTTGCGT                        |                         |
